# Supplementary material for: Oxygen vacancy enriched Na1.19V8O20·4.42H2O nanosheets for fast and stable Zn-ion batteries
Source: Royal Society of Chemistry journal article supplement (doi:10.1039/d3cc03505k), 2023-01-01
Supplement: d3cc03505k1.pdf [file d3cc03505k1.pdf]

## Electronic Supplementary Information

# **Oxygen vacancy enriched $\text{Na}_{1.19}\text{V}_8\text{O}_{20} \cdot 4.42\text{H}_2\text{O}$ nanosheets for fast and stable Zn-ion battery**

Mengcheng Wu,<sup>a</sup> Jie Li,<sup>a</sup> Mengda Xue,<sup>a</sup> Xun Zhao,<sup>a</sup> Lei Mao,<sup>a</sup> and Lingyun Chen <sup>\*a</sup>

<sup>a</sup> School of Chemistry and Chemical Engineering, Chongqing University, Chongqing 400044, P. R.

China

\*E-mail: lychen@cqu.edu.cn (L. Chen)

## **Experimental section**

### **1. Materials preparation**

#### **1.1 Synthesis of VOPO<sub>4</sub>·2H<sub>2</sub>O**

Firstly, 2.4 g of V<sub>2</sub>O<sub>5</sub> powder was added into 57.7 mL of deionized water following by magnetic stirring for 10 minutes. Then, 13.3 mL of concentrated H<sub>3</sub>PO<sub>4</sub> was added into the above solution and magnetically stirred for 2.0 h. Subsequently, the mixed solution was transferred into a 100 mL Teflon-lined stainless-steel autoclave and heated to 120 °C for 16 h. Finally, the obtained yellow product was washed with water and acetone three times, respectively, and then dried at 60°C for 12 h under vacuum.

#### **1.2. Synthesis of V<sub>o</sub>-NVO-2**

V<sub>o</sub>-NVO-2 are prepared through a facile one-step hydrothermal method. Briefly, 200 mg of as-prepared VOPO<sub>4</sub>·2H<sub>2</sub>O and 25.2 mg of Na<sub>2</sub>SO<sub>3</sub> were dispersed in 60 mL of deionized water and magnetically stirred for 20 minutes. Afterwards, the mixed solution was transferred into a 100 mL Teflon-lined stainless-steel autoclave and heated to 180 °C for 16 hours. Finally, the V<sub>o</sub>-NVO-2 sample was collected through filtration and washed three times with water and ethanol respectively. The sample was dried in a vacuum oven at 80 °C for 12 h. NVO and V<sub>o</sub>-NVO-2 were prepared using the same process, except that 0.2 mmol Na<sub>2</sub>SO<sub>3</sub> was replaced with 0.2 mmol Na<sub>2</sub>SO<sub>4</sub> and a mixture of 0.1 mmol Na<sub>2</sub>SO<sub>3</sub> and 0.1 mmol Na<sub>2</sub>SO<sub>4</sub>, respectively.

### **2. Materials characterization**

The X-ray diffraction (XRD) patterns were performed using the Bruker D8 Advance powder diffractometer with a Cu K $\alpha$  radiation ( $\lambda = 1.5406 \text{ \AA}$ ) to determine their crystal structure information of the samples. Inductively coupled plasma optical emission spectrometer (ICP-OES, Agilent 5110) was used to analyze the element ratios. Thermogravimetric analysis (TGA, Mettler Toledo TGA2)

was carried out to detect the content of structural water. The microstructure of the samples was observed through scanning electron microscopy (SEM, Quattro S). Transmission electron microscope (TEM) images, selected area electron diffraction (SAED), energy dispersive spectrometry (EDS) spectra and element mapping were obtained using transmission electron microscope (Talos F200S). X-ray photoelectron spectroscopy (XPS) was conducted on the Thermo Scientific K-Alpha electron spectrometer. The oxygen vacancies in the samples were characterized by electron paramagnetic resonance (EPR) (Bruker EMXplus). Raman spectra was performed by laser confocal Raman spectrometer (Raman, LabRAM HR Evolution) under laser excitation at 532 nm.

### **3. Electrochemical measurement**

For the preparation of cathode, polyvinylidene fluoride, acetylene black, and active materials were fully mixed in N-methyl-2-pyrrolidone solvent with a mass ratio of 1:2:7 and then the slurry was uniformly coated on titanium foil and dried at 80°C for 12 h under vacuum. The mass loading of the active materials was 1.2~1.6 mg cm<sup>-2</sup>. The aqueous ZIBs were assembled with zinc foil as the anode, glass fiber membrane as the separator, and 2 M Zn(CF<sub>3</sub>SO<sub>3</sub>)<sub>2</sub> aqueous solution as the electrolyte. Galvanostatic charge/discharge (GCD) and galvanostatic intermittent titration technique (GITT) tests were conducted via a LAND battery testing system (CT3001A) within the voltage window of 0.2–1.6 V. Cyclic voltammogram (CV) and electrochemical impedance spectroscopy (EIS) were performed with a CHI660E electrochemical workstation.

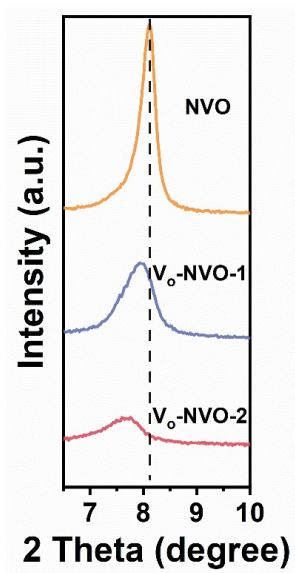

Fig. S1. The partial enlarged XRD pattern.

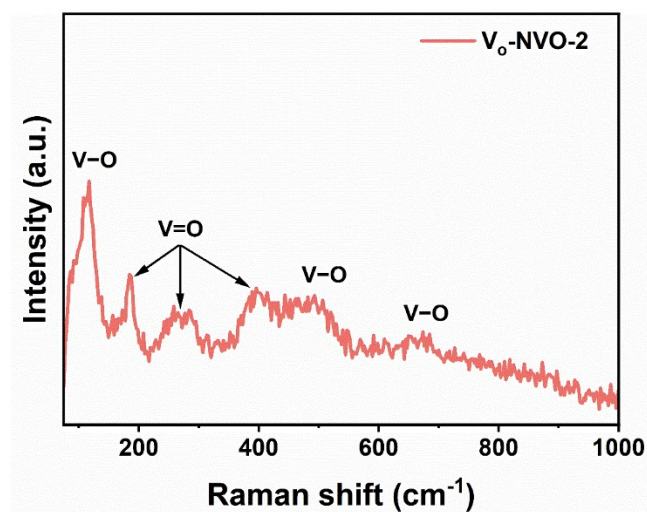

**Fig. S2.** The Raman spectrum of V<sub>o</sub>-NVO-2 sample.

The peaks of V<sub>o</sub>-NVO-2 located at 116, 484, and 684 cm<sup>-1</sup> could be attributed to bending and stretching vibration mode of V–O bonds, while the bending vibration of V=O bonds can be detected at the peaks of 188, 264, and 402 cm<sup>-1</sup>.<sup>1,2</sup>

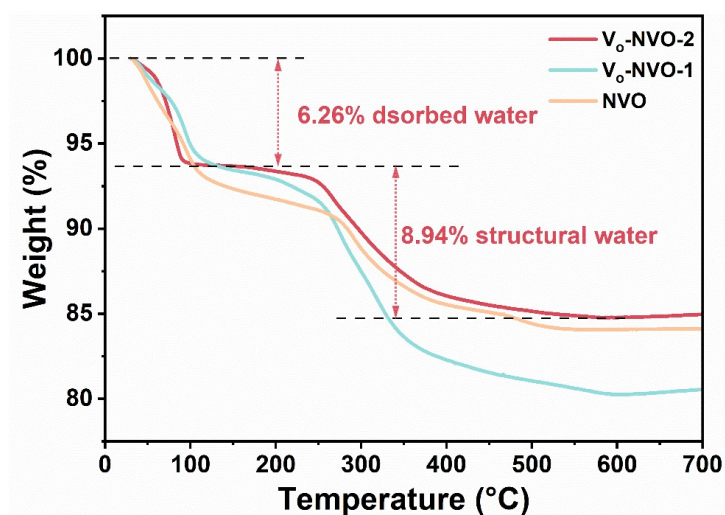

**Fig. S3.** The TGA curves V<sub>o</sub>-NVO-2, V<sub>o</sub>-NVO-1, and NVO.

The TGA curves in Fig. S3 show that V<sub>o</sub>-NVO-2, V<sub>o</sub>-NVO-1, and NVO all have rich structural water content, which are 8.94%, 12.99%, and 7.54%, respectively. An appropriate amount of structural water can boost ion transport by shielding the effective charge of Zn<sup>2+</sup> ions while reducing the hindrance to the migration of Zn<sup>2+</sup> ions, enabling fast Zn<sup>2+</sup> storage.<sup>3</sup> However, it cannot be ignored that the structural water accompanied by abundant hydrogen bonding will cause channel blockage, which hinders ion migration.<sup>4</sup> Therefore, excessive structural water is detrimental to the performance of materials.

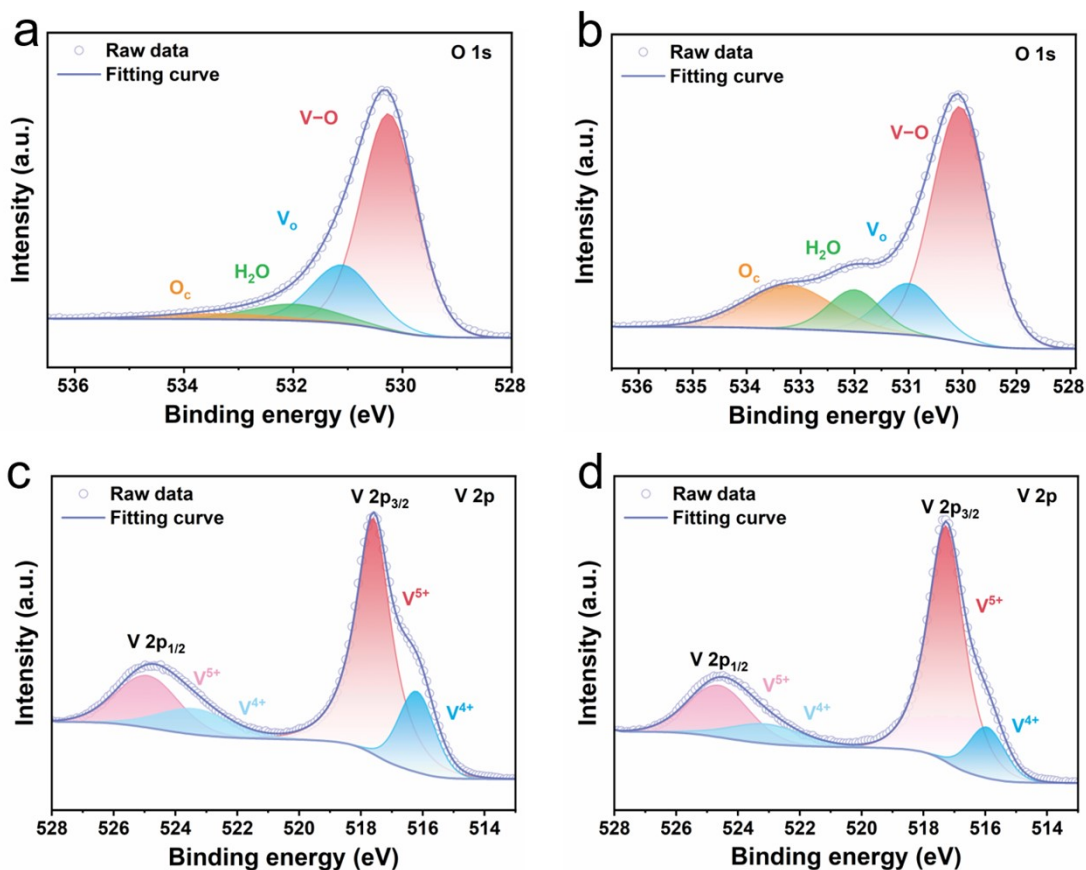

**Fig. S4.** The O 1s fine spectra of (a) V<sub>o</sub>-NVO-1 and (b) NVO. The V 2p fine spectra of (c) V<sub>o</sub>-NVO-1 and (d) NVO.

According to the peak area ratio of V 2p<sub>3/2</sub> with different vanadium valence states in the V 2p XPS spectra,<sup>5</sup> the average valence state of vanadium on the material surface can be calculated using the following formula:

$$V_a = 5 \times \frac{m}{m+n} + 4 \times \frac{n}{m+n}$$

Where  $V_a$  represents the average valence state of vanadium,  $m$  is the peak area of V<sup>5+</sup> in V 2p<sub>3/2</sub> characteristic peak, and  $n$  is the peak area of V<sup>4+</sup> in V 2p<sub>3/2</sub> characteristic peak.

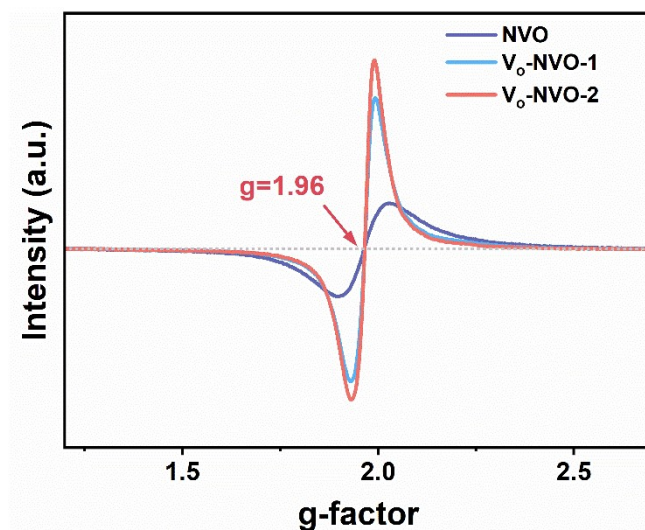

**Fig. S5.** The EPR spectra of V<sub>0</sub>-NVO-2, V<sub>0</sub>-NVO-1, and NVO.



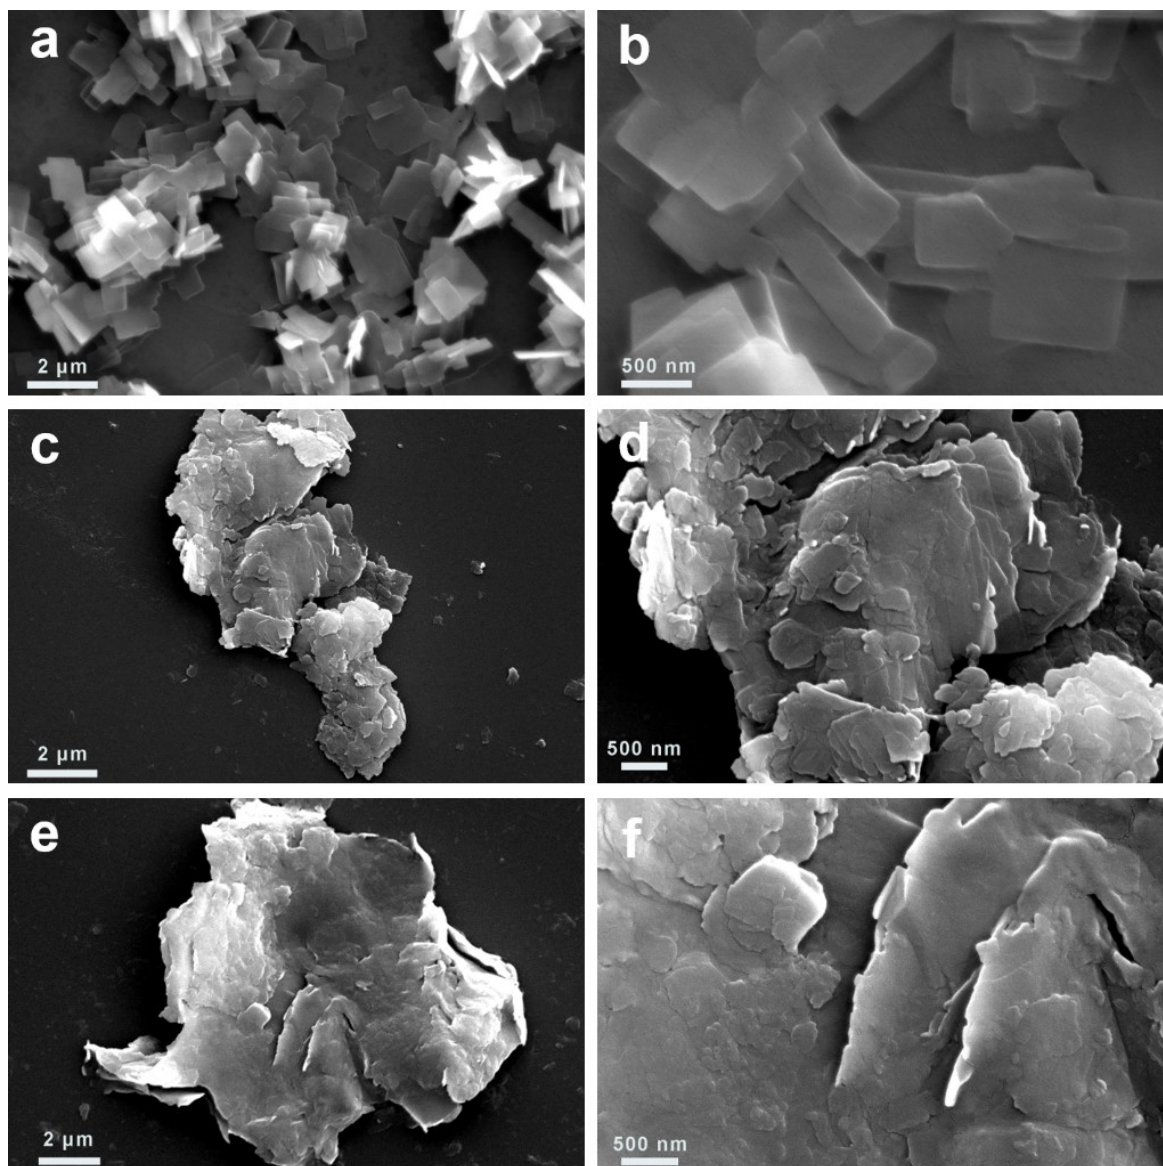

**Fig. S6.** The SEM images of (a-b)  $V_o$ -NVO-2, (c-d)  $V_o$ -NVO-1, and (e-f) NVO.

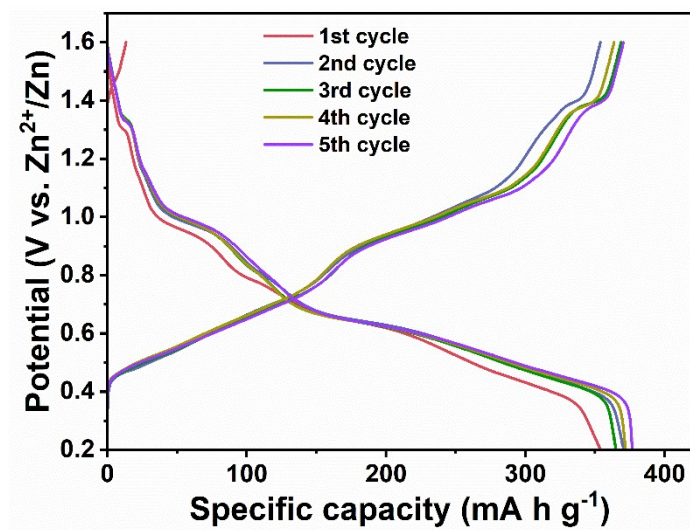

Fig. S7. The GCD curves of V<sub>o</sub>-NVO-2 at the 0.1 A g<sup>-1</sup>.

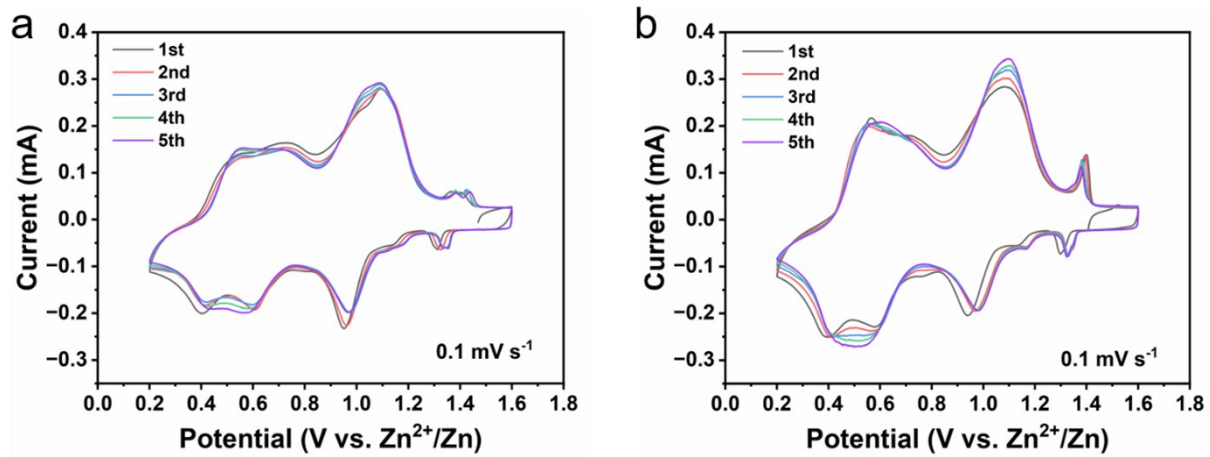

**Fig. S8.** The CV curves of (a) NVO and (b) V<sub>0</sub>-NVO-1 at the scan rate of 0.1 mV s<sup>-1</sup>.

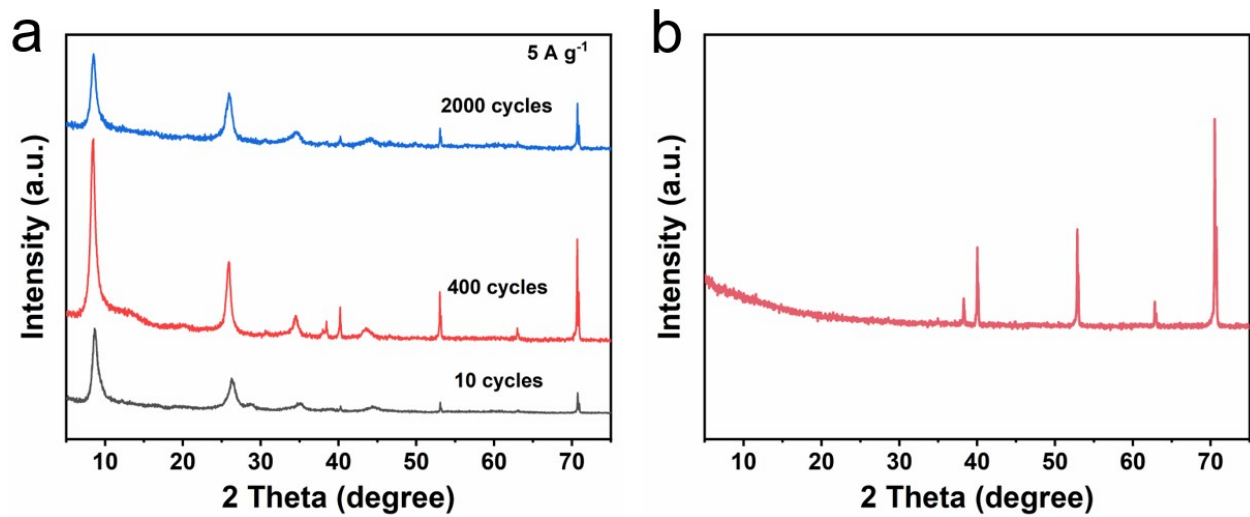

**Fig. S9.** (a) Ex-situ XRD patterns of V<sub>o</sub>-NVO-2 at the 10th cycle, 400th cycle and 2000th cycle. (b) XRD pattern of titanium foil.

Based on the XRD images of V<sub>o</sub>-NVO-2 after different cycles at 5 A g<sup>-1</sup>, it is found that the interlayer spacing expands with the number of cycles increasing from 10 to 400, which may be due to the gradually trapped Zn<sup>2+</sup> in the irreversible sites widens the interlayer spacing. Then the interlayer spacing hardly changes during the subsequent cycle to 2000 cycles, indicating that the V<sub>o</sub>-NVO-2 has basically reached a stable charging/discharging state after 400 cycles.

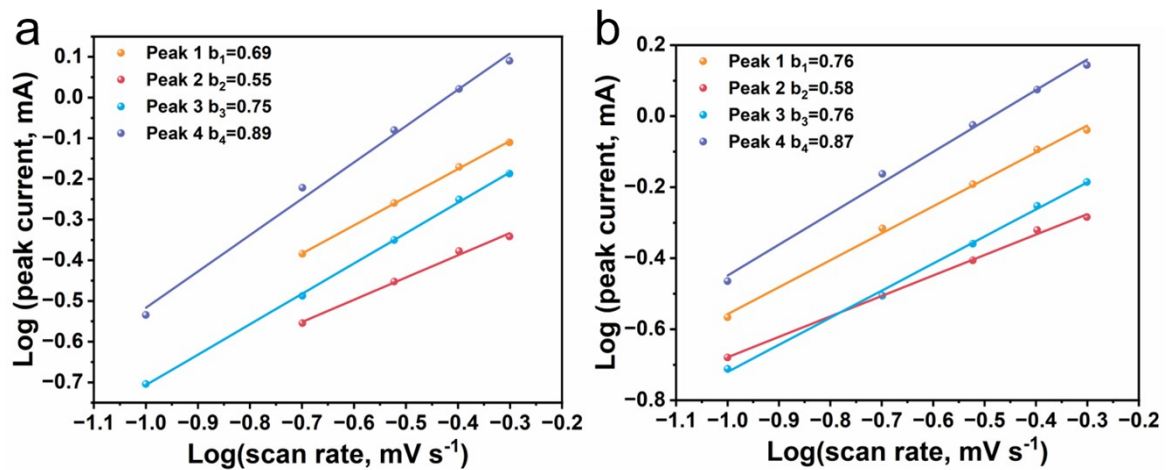

**Fig. S10.** The fitting  $b$  values of (a) NVO and (b)  $V_0$ -NVO-1.

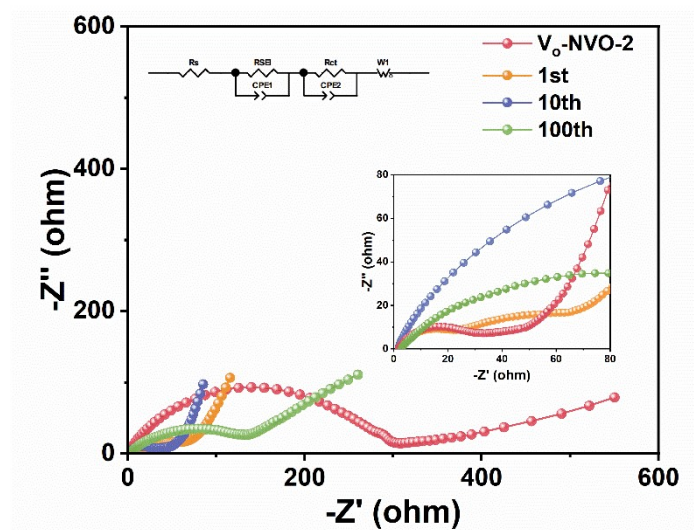

**Fig. S11.** EIS curves of V<sub>o</sub>-NVO-2 at pristine state, after 1 cycle, after 10 cycles, and after 100 cycles at 0.1 A g<sup>-1</sup>.

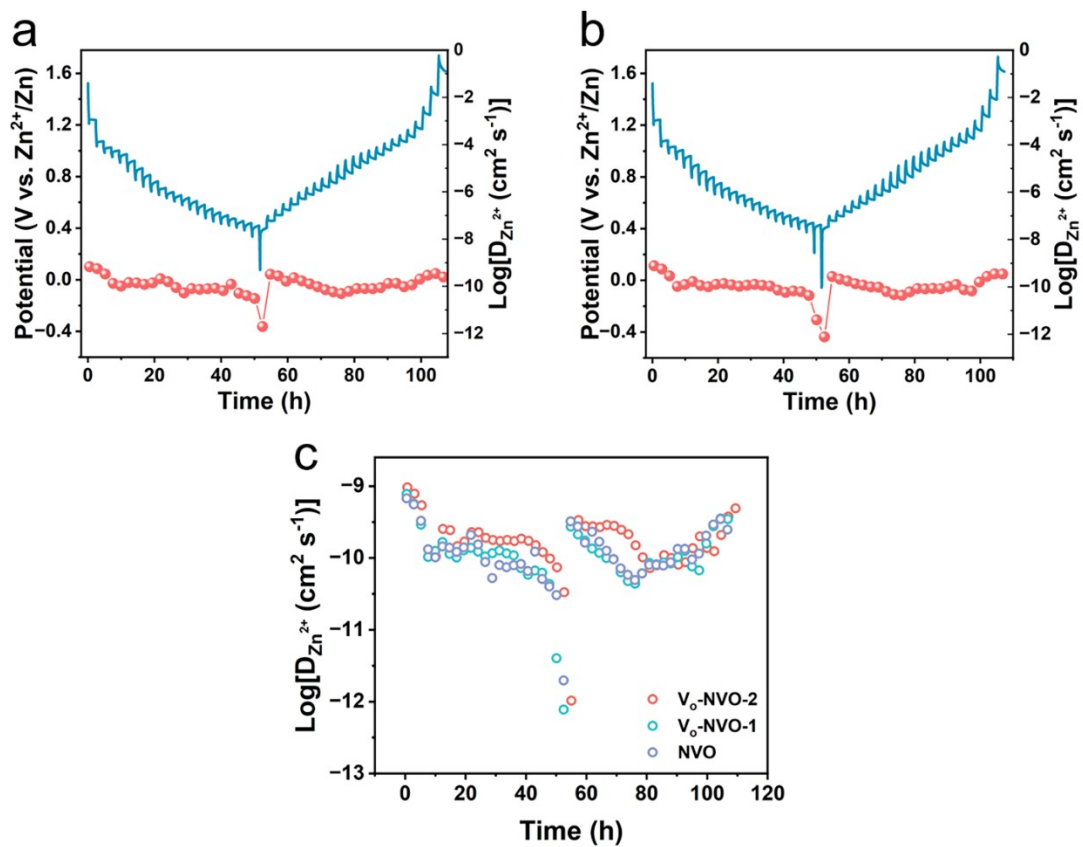

**Fig. S12.** The GITT curve and corresponding  $\text{Zn}^{2+}$  diffusion coefficient of (a) NVO and (b)  $\text{V}_o\text{-NVO-1}$ , (c) the comparison  $\text{Zn}^{2+}$  diffusion coefficient of  $\text{V}_o\text{-NVO-2}$ ,  $\text{V}_o\text{-NVO-1}$ , and NVO.



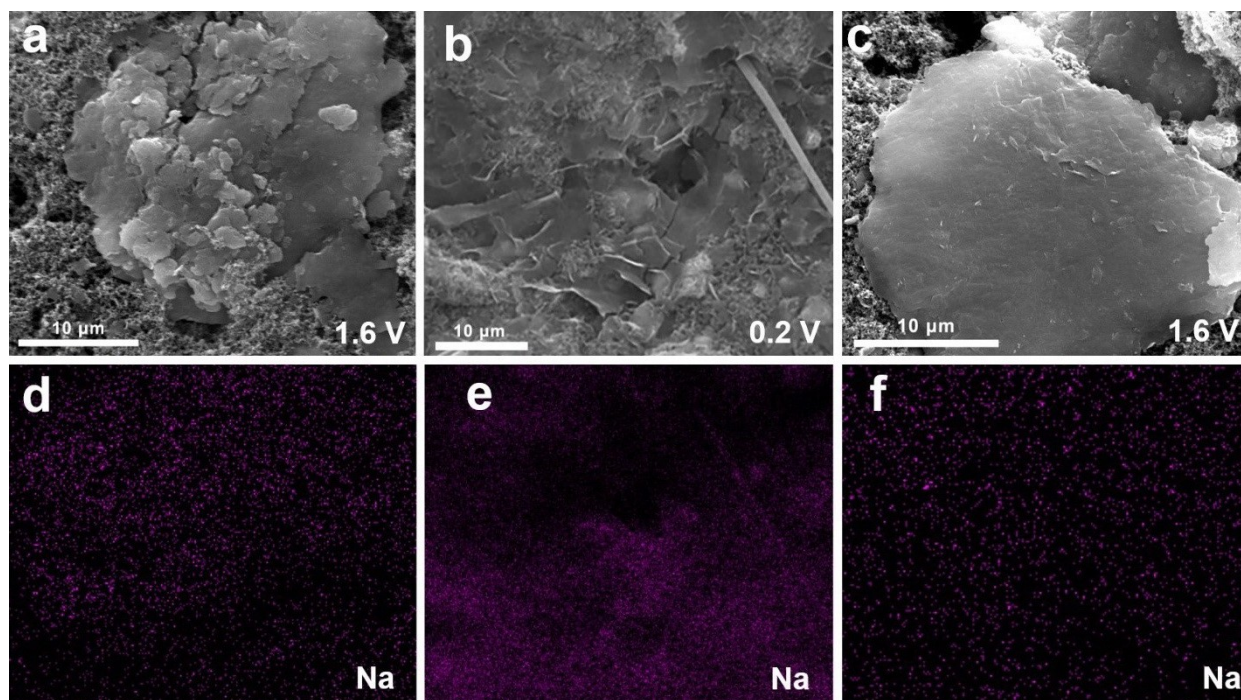

**Fig. S13.** The SEM images and element mapping images of the V<sub>o</sub>-NVO-2 electrode in the (a, d) 1.6 V and (b, e) 0.2 V, (c, f) 1.6 V.



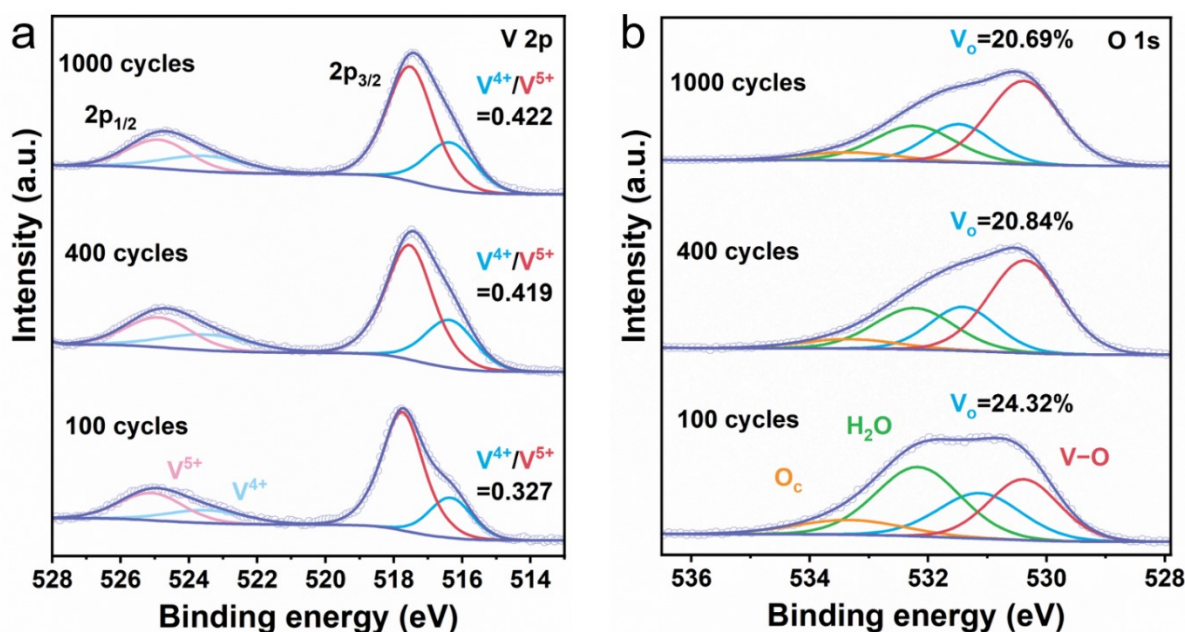

**Fig. S14.** The XPS spectra of (a) V 2p and (b) O 1s of V<sub>o</sub>-NVO-2 after 100 cycles, 400 cycles, and 1000 cycles at 5 A g<sup>-1</sup>.

The XPS fine spectra of V 2p and O 1s measured after different cycles of V<sub>o</sub>-NVO-2 at 5A g<sup>-1</sup> are shown in Fig. S14. We found that as the number of cycles increases, the proportion of V<sup>4+</sup> in V<sub>o</sub>-NVO-2 gradually increases, indicating a decrease in the average valence state of vanadium. After 400 cycles, the ratio of V<sup>4+</sup>/V<sup>5+</sup> is 0.419, corresponding to an average valence state of 4.70 for vanadium. This phenomenon suggests that the active sites in V<sub>o</sub>-NVO-2 are gradually occupied by Zn<sup>2+</sup> during the cycling process, leading to a continuous decrease in the valence state of vanadium. It is worth noting that after 400 cycles, the valence state of vanadium in V<sub>o</sub>-NVO-2 hardly changes, indicating the material has reached a relatively stable state. The variation of oxygen vacancy content in the O 1s spectrum shows a same trend with vanadium valence state. These phenomena confirm the high stability and reversibility of materials during long-term cycling.

**Table S1** The ICP-OES result of the V<sub>o</sub>-NVO-2

| Element | Mass content (%) | Molar ratio |
|---------|------------------|-------------|
| Na      | 3.39             | 1.19        |
| V       | 50.53            | 8.0         |

**Table S2** Comparison of the resistance values of NVO, V<sub>o</sub>-NVO-1, V<sub>o</sub>-NVO-2.

| State                 | $R_s$ ( $\Omega$ ) | $R_{ct}$ ( $\Omega$ ) |
|-----------------------|--------------------|-----------------------|
| NVO                   | 1.65               | 689.6                 |
| V <sub>o</sub> -NVO-1 | 1.26               | 421.7                 |
| V <sub>o</sub> -NVO-2 | 1.352              | 275.6                 |

**Table S3** Comparison of the resistance values of V<sub>o</sub>-NVO-2 measured at pristine, after 1 cycle, 10 cycles, and 100 cycles.

| State                   | $R_s$ ( $\Omega$ ) | $R_{SEI}$ ( $\Omega$ ) | $R_{ct}$ ( $\Omega$ ) |
|-------------------------|--------------------|------------------------|-----------------------|
| Pristine                | 1.352              | -                      | 275.6                 |
| 1 <sup>th</sup> cycle   | 2.07               | 16.63                  | 59.47                 |
| 10 <sup>th</sup> cycle  | 1.698              | 26.07                  | 9.022                 |
| 100 <sup>th</sup> cycle | 2.577              | 28.5                   | 91.83                 |

## Supplementary references

- 1 X. Wang, Y. Wang, A. Naveed, G. Li, H. Zhang, Y. Zhou, A. Dou, M. Su, Y. Liu, R. Guo and C. C. Li, *Adv. Funct. Mater.*, 2023, 2306205.
- 2 S. Zhang, Z. Zou, Y. Gao, J. Geng, M. Chen, W. Ling, F. Liang, X. Peng, M. Zhou, F. Yu and S. Jia, *Nano Energy*, 2023, **115**, 108736.
- 3 H. He, F.-C. Pan, X.-W. Liang, Q. Hu, S. Liu, J. Hu, S. C. Jun, D. Lin, Y. Yamauchi and Y. Huo, *Chem. Eng. J.*, 2023, **462**, 142221.
- 4 K. Yang, Y. Hu, L. Li, L. Cui, L. He, S. Wang, J. Zhao and Y.-F. Song, *Nano Energy*, 2020, **74**, 104851.
- 5 M. Du, C. Liu, F. Zhang, W. Dong, X. Zhang, Y. Sang, J.-J. Wang, Y.-G. Guo, H. Liu and S. Wang, *Advanced Science*, 2020, **7**, 2000083.
